# Supplementary material for: Prognostic model for risk stratification of de novo metastatic nasopharyngeal carcinoma patients treated with chemotherapy followed by locoregional radiotherapy
Source: PubMed Central journal article supplement — ESMO Open. 2021 Jan 4;6(1):100004. doi: 10.1016/j.esmoop.2020.100004 (PMC7807936; doi:10.1016/j.esmoop.2020.100004), 2021-01-04
Supplement: mmc1.pdf [file mmc1.pdf]

# Supplementary Materials

## Supplementary Tables:

**Table S1.** The details of treatment-related information.

**Table S2.** Univariate association of the patient characteristics with overall survival in training set.

**Table S3.** Comparison of patient characteristics stratified by three risk subgroups.

## Supplementary Figures:

**Figure S1.** The number of missing values (A) and the combinations of missing values (B) in the dataset.

**Figure S2.** Unstratified Kaplan-Meier curve of training set (A) and validation set (B).

**Figure S3.** The pair-wise correlations among variables used in multivariable analysis. An absolute correlation coefficient less than 0.5 indicates weak correlation.

**Figure S4.** The Variance Inflation Factor (VIF) plot and Eigenvalues (EV) plot of variables used in multivariate analysis. A VIF value  $<10$  and an EV value  $>0.01$  indicate not severe multilinearity.

**Figure S5.** Proportional hazards diagnostics with Schoenfeld residuals tests in the multivariate Cox regression model. A P-value  $>0.05$  meets the proportional hazards assumption.

**Figure S6.** The example of how to use the nomogram.

**Table S1.** The details of treatment-related information.

| <b>Treatment factors</b>         | <b>Total<br/>(N=244)</b> |
|----------------------------------|--------------------------|
| First-line chemotherapy regimen  |                          |
| GP                               | 13 (5.3)                 |
| FP                               | 74 (30.3)                |
| TP                               | 62 (25.4)                |
| TPF                              | 95 (38.9)                |
| Cycle of first-line chemotherapy |                          |
| <6                               | 97 (39.8)                |
| ≥6                               | 147 (60.2)               |
| RT technique                     |                          |
| CRT                              | 39(16.0)                 |
| IMRT                             | 205 (84.0)               |
| RT dose (continuous)             |                          |
| Mean (Gy)                        | 69.1                     |
| Median (Gy)                      | 70                       |
| Range (Gy)                       | 44-74                    |
| Interquartile Range              | 68-70                    |
| RT dose (group)                  |                          |
| <60Gy                            | 2 (0.8)                  |
| 60-69.9Gy                        | 71 (29.1)                |
| ≥70Gy                            | 171 (70.1)               |
| Concurrent treatment             |                          |
| No                               | 113 (46.3)               |
| Yes                              | 131 (53.7)               |
| Concurrent chemotherapy          |                          |
| No                               | 122 (50.0)               |
| Cisplatin                        | 90 (36.9)                |
| Other platinum drugs             | 15 (6.1)                 |
| Non-platinum drugs               | 17 (7.0)                 |
| Cycle of concurrent chemotherapy |                          |
| 0                                | 122 (50.0)               |
| 1                                | 15 (6.1)                 |
| 2                                | 82 (33.6)                |
| 3                                | 15 (6.1)                 |
| ≥4                               | 10 (4.1)                 |
| Other concurrent treatment       |                          |
| No                               | 229 (93.9)               |
| Nimotuzumab                      | 8 (3.3)                  |
| Cetuximab                        | 5 (2.0)                  |
| Bevacizumab                      | 1 (0.4)                  |
| CIK therapy                      | 1 (0.4)                  |
| Local treatment to metastasis    |                          |
| No                               | 173 (70.9)               |
| Local RT                         | 56 (23.0)                |
| Local ablation                   | 11 (4.5)                 |
| Surgery                          | 2 (0.8)                  |
| Ablation plus local RT           | 2 (0.8)                  |
| Ablation plus surgery            | 0 (0)                    |

Abbreviation: RT, radiotherapy; GP, gemcitabine and platinum; FP, 5-fluorouracil and platinum; TP, taxane and platinum; TPF, taxane, platinum and 5-fluorouracil; CRT, conventional radiotherapy; IMRT, intensity-modulated radiotherapy; CIK, cytokines induced killer.

| <b>Table S2. Univariate association of the patient characteristics with overall survival in training set.</b>                                                                                                                                                                                                |           |               |          |
|--------------------------------------------------------------------------------------------------------------------------------------------------------------------------------------------------------------------------------------------------------------------------------------------------------------|-----------|---------------|----------|
| <b>Characteristics</b>                                                                                                                                                                                                                                                                                       | <b>HR</b> | <b>95% CI</b> | <b>P</b> |
| Age (year)                                                                                                                                                                                                                                                                                                   | 1.01      | 0.991-1.04    | 0.240    |
| Sex: male v female                                                                                                                                                                                                                                                                                           | 1.81      | 0.83-3.95     | 0.134    |
| Comorbidity: present vs. absent                                                                                                                                                                                                                                                                              | 1.21      | 0.76-1.94     | 0.418    |
| KPS: ≥80 vs. <80                                                                                                                                                                                                                                                                                             | 0.86      | 0.54-1.37     | 0.531    |
| Smoking: yes vs. no                                                                                                                                                                                                                                                                                          | 1.62      | 1.03-2.55     | 0.038    |
| Drinking: yes vs. no                                                                                                                                                                                                                                                                                         | 1.43      | 0.73-2.78     | 0.296    |
| Body mass index (kg/m <sup>2</sup> )                                                                                                                                                                                                                                                                         | 1.00      | 0.94-1.07     | 0.946    |
| Histology: type III vs. type II                                                                                                                                                                                                                                                                              | 0.82      | 0.33-2.03     | 0.665    |
| T stage:                                                                                                                                                                                                                                                                                                     |           |               |          |
| T3 vs. T1-2                                                                                                                                                                                                                                                                                                  | 0.97      | 0.50-1.88     | 0.937    |
| T4 vs. T1-2                                                                                                                                                                                                                                                                                                  | 1.43      | 0.73-2.80     | 0.300    |
| N stage                                                                                                                                                                                                                                                                                                      |           |               |          |
| N2 vs. N0-1                                                                                                                                                                                                                                                                                                  | 1.40      | 0.75-2.61     | 0.291    |
| N3 vs. N0-1                                                                                                                                                                                                                                                                                                  | 1.47      | 0.73-2.95     | 0.283    |
| No. of metastatic sites:<br>single vs. multiple                                                                                                                                                                                                                                                              | 0.37      | 0.22-0.62     | <0.001   |
| No. of metastatic lesions:<br>single vs. multiple                                                                                                                                                                                                                                                            | 0.69      | 0.41-1.16     | 0.164    |
| Live metastasis: present vs. absent                                                                                                                                                                                                                                                                          | 2.60      | 1.53-4.40     | <0.001   |
| Bone metastasis: present vs. absent                                                                                                                                                                                                                                                                          | 0.84      | 0.51-1.38     | 0.490    |
| Lung metastasis: present vs. absent                                                                                                                                                                                                                                                                          | 1.03      | 0.61-1.73     | 0.919    |
| Pretreatment EBV DNA:<br>detectable vs. undetectable                                                                                                                                                                                                                                                         | 1.63      | 0.75-3.55     | 0.220    |
| Lactate dehydrogenase (U/L)                                                                                                                                                                                                                                                                                  | 1.00      | 0.99-1.00     | 0.058    |
| Alkaline phosphatase (U/L)                                                                                                                                                                                                                                                                                   | 1.00      | 0.99-1.01     | 0.270    |
| C-reactive protein (g/mL)                                                                                                                                                                                                                                                                                    | 1.02      | 1.01-1.04     | 0.004    |
| Albumin (g/L)                                                                                                                                                                                                                                                                                                | 0.94      | 0.88-1.01     | 0.089    |
| Neutrophil (10 <sup>9</sup> E)                                                                                                                                                                                                                                                                               | 0.96      | 0.84-1.09     | 0.532    |
| Hemoglobin (g/L)                                                                                                                                                                                                                                                                                             | 1.00      | 0.98-1.02     | 0.936    |
| Thrombocyte (10 <sup>9</sup> E)                                                                                                                                                                                                                                                                              | 1.00      | 0.99-1.00     | 0.128    |
| First-line chemotherapy regimen:                                                                                                                                                                                                                                                                             |           |               |          |
| FP vs. GP                                                                                                                                                                                                                                                                                                    | 0.41      | 0.14-1.22     | 0.108    |
| TP vs. GP                                                                                                                                                                                                                                                                                                    | 0.59      | 0.21-1.72     | 0.337    |
| TPF vs. GP                                                                                                                                                                                                                                                                                                   | 0.40      | 0.14-1.16     | 0.092    |
| Cycle of first-line chemotherapy:<br>≥6 vs. <6                                                                                                                                                                                                                                                               | 0.92      | 0.58-1.45     | 0.703    |
| Radiotherapy dose (Gy): ≥66 vs. <66                                                                                                                                                                                                                                                                          | 4.46      | 0.62-36.20    | 0.138    |
| Concurrent treatment: yes vs. no                                                                                                                                                                                                                                                                             | 1.08      | 0.68-1.7      | 0.748    |
| Local treatment to metastasis: yes vs. no                                                                                                                                                                                                                                                                    | 0.65      | 0.38-1.12     | 0.118    |
| Posttreatment EBV DNA:<br>detectable vs. undetectable                                                                                                                                                                                                                                                        | 3.62      | 2.28-5.75     | <0.001   |
| Response of primary tumor:                                                                                                                                                                                                                                                                                   |           |               |          |
| PR vs. CR                                                                                                                                                                                                                                                                                                    | 1.16      | 0.53-2.54     | 0.704    |
| SD/PD vs. CR                                                                                                                                                                                                                                                                                                 | 2.03      | 0.64-6.39     | 0.229    |
| Response of metastasis:                                                                                                                                                                                                                                                                                      |           |               |          |
| PR vs. CR                                                                                                                                                                                                                                                                                                    | 1.85      | 0.73-4.70     | 0.195    |
| SD/PD v CR                                                                                                                                                                                                                                                                                                   | 5.48      | 2.13-14.13    | <0.001   |
| Abbreviation: KPS, Karnofsky Performance Scale; EBV DNA, Epstein–Barr virus DNA; FP, 5-fluorouracil and platinum; TP, taxane and platinum; GP, gemcitabine and platinum; TPF, taxane, platinum and 5-fluorouracil; CR, complete response; PR, partial response; SD, stable disease; PD, progression disease. |           |               |          |

**Table S3.** Comparison of Patient Characteristics Stratified by Three Risk Subgroups.

| <b>Variable</b>                      | <b>Low risk<br/>N=166</b> | <b>Medium risk<br/>N=51</b> | <b>High risk<br/>N=27</b> | <b>P value</b> |
|--------------------------------------|---------------------------|-----------------------------|---------------------------|----------------|
| Age (year)                           | 45.0 [39.0; 52.0]         | 46.0 [39.5; 55.0]           | 47.0 [40.0; 54.0]         | 0.676          |
| Sex                                  |                           |                             |                           | 0.707          |
| Female                               | 25 (15.1)                 | 5 (9.80)                    | 3 (11.1)                  |                |
| Male                                 | 141 (84.9)                | 46 (90.2)                   | 24 (88.9)                 |                |
| Comorbidity                          |                           |                             |                           | 0.256          |
| Absent                               | 111 (66.9)                | 39 (76.5)                   | 16 (59.3)                 |                |
| Present                              | 55 (33.1)                 | 12 (23.5)                   | 11 (40.7)                 |                |
| Karnofsky Performance Scale          |                           |                             |                           | 0.691          |
| <80                                  | 42 (25.3)                 | 10 (19.6)                   | 7 (25.9)                  |                |
| ≥80                                  | 124 (74.7)                | 41 (80.4)                   | 20 (74.1)                 |                |
| Smoking                              |                           |                             |                           | 0.489          |
| No                                   | 106 (63.9)                | 32 (62.7)                   | 14 (51.9)                 |                |
| Yes                                  | 60 (36.1)                 | 19 (37.3)                   | 13 (48.1)                 |                |
| Drinking                             |                           |                             |                           | 0.882          |
| No                                   | 151 (91.0)                | 47 (92.2)                   | 24 (88.9)                 |                |
| Yes                                  | 15 (9.04)                 | 4 (7.84)                    | 3 (11.1)                  |                |
| Body mass index (kg/m <sup>2</sup> ) | 21.5 [19.4; 23.8]         | 20.4 [18.3; 23.2]           | 22.7 [19.6; 24.8]         | 0.193          |
| Histology                            |                           |                             |                           | 1.000          |
| II                                   | 9 (5.42)                  | 2 (3.92)                    | 1 (3.70)                  |                |
| III                                  | 157 (94.6)                | 49 (96.1)                   | 26 (96.3)                 |                |
| T category                           |                           |                             |                           | 0.604          |
| T1                                   | 11 (6.63)                 | 2 (3.92)                    | 1 (3.70)                  |                |
| T2                                   | 14 (8.43)                 | 8 (15.7)                    | 5 (18.5)                  |                |
| T3                                   | 82 (49.4)                 | 24 (47.1)                   | 11 (40.7)                 |                |
| T4                                   | 59 (35.5)                 | 17 (33.3)                   | 10 (37.0)                 |                |
| N category                           |                           |                             |                           | 0.622          |
| N0                                   | 5 (3.01)                  | 1 (1.96)                    | 0 (0.00)                  |                |
| N1                                   | 32 (19.3)                 | 7 (13.7)                    | 2 (7.41)                  |                |
| N2                                   | 69 (41.6)                 | 25 (49.0)                   | 16 (59.3)                 |                |
| N4                                   | 60 (36.1)                 | 18 (35.3)                   | 9 (33.3)                  |                |
| No. of metastatic sites              |                           |                             |                           | <0.001         |
| Single                               | 143 (86.1)                | 34 (66.7)                   | 12 (44.4)                 |                |
| Multiple                             | 23 (13.9)                 | 17 (33.3)                   | 15 (55.6)                 |                |
| No. of metastatic lesions            |                           |                             |                           | 0.139          |
| Single                               | 54 (32.5)                 | 13 (25.5)                   | 4 (14.8)                  |                |
| Multiple                             | 112 (67.5)                | 38 (74.5)                   | 23 (85.2)                 |                |
| Liver metastasis                     |                           |                             |                           | <0.001         |
| No                                   | 150 (90.4)                | 35 (68.6)                   | 12 (44.4)                 |                |
| Yes                                  | 16 (9.64)                 | 16 (31.4)                   | 15 (55.6)                 |                |
| Bone metastasis                      |                           |                             |                           | 0.552          |
| No                                   | 52 (31.3)                 | 13 (25.5)                   | 10 (37.0)                 |                |
| Yes                                  | 114 (68.7)                | 38 (74.5)                   | 17 (63.0)                 |                |
| Lung metastasis                      |                           |                             |                           | 0.824          |
| No                                   | 126 (75.9)                | 38 (74.5)                   | 19 (70.4)                 |                |
| Yes                                  | 40 (24.1)                 | 13 (25.5)                   | 8 (29.6)                  |                |
| Pretreatment EBV DNA                 |                           |                             |                           | 0.174          |
| Undetectable                         | 22 (13.3)                 | 3 (5.88)                    | 0 (0.00)                  |                |
| Detectable                           | 134 (80.7)                | 45 (88.2)                   | 26 (96.3)                 |                |
| Missing                              | 10 (6.02)                 | 3 (5.88)                    | 1 (3.70)                  |                |

|                                  |                   |                   |                   |        |
|----------------------------------|-------------------|-------------------|-------------------|--------|
| Lactate dehydrogenase (U/L)      | 193 [163; 232]    | 222 [179; 316]    | 232 [188; 408]    | <0.001 |
| Alkaline phosphatase (U/L)       | 76.8 [66.0; 92.2] | 85.0 [68.4; 94.0] | 80.0 [69.2; 91.3] | 0.278  |
| C-reactive protein (g/mL)        | 2.42 [0.99; 7.44] | 4.44 [1.40; 12.9] | 15.7 [4.74; 38.5] | <0.001 |
| Albumin (g/L)                    | 44.0 [41.8; 45.4] | 43.0 [41.0; 44.7] | 42.6 [40.2; 45.8] | 0.105  |
| Neutrophil (10 <sup>9</sup> E)   | 4.56 [3.50; 5.77] | 4.40 [3.70; 5.85] | 4.50 [3.75; 5.40] | 0.843  |
| Hemoglobin (g/L)                 | 143 [132; 152]    | 142 [130; 151]    | 142 [133; 147]    | 0.876  |
| Thrombocyte (10 <sup>9</sup> E)  | 246 [207; 296]    | 244 [216; 290]    | 252 [184; 306]    | 0.859  |
| Chemotherapy regimen             |                   |                   |                   | 0.377  |
| GP                               | 7 (4.22)          | 4 (7.84)          | 2 (7.41)          |        |
| FP                               | 47 (28.3)         | 15 (29.4)         | 12 (44.4)         |        |
| TP                               | 41 (24.7)         | 15 (29.4)         | 6 (22.2)          |        |
| TPF                              | 71 (42.8)         | 17 (33.3)         | 7 (25.9)          |        |
| Cycle of first-line chemotherapy |                   |                   |                   | 0.487  |
| <6                               | 62 (37.3)         | 22 (43.1)         | 13 (48.1)         |        |
| ≥6                               | 104 (62.7)        | 29 (56.9)         | 14 (51.9)         |        |
| Radiotherapy dose (Gy)           |                   |                   |                   | 0.691  |
| <66                              | 6 (3.61)          | 3 (5.88)          | 1 (3.70)          |        |
| ≥66                              | 160 (96.4)        | 48 (94.1)         | 26 (96.3)         |        |
| Concurrent treatment             |                   |                   |                   | 0.710  |
| No                               | 74 (44.6)         | 25 (49.0)         | 14 (51.9)         |        |
| Yes                              | 92 (55.4)         | 26 (51.0)         | 13 (48.1)         |        |
| Local treatment to metastasis    |                   |                   |                   | 0.717  |
| No                               | 115 (69.3)        | 38 (74.5)         | 20 (74.1)         |        |
| Yes                              | 51 (30.7)         | 13 (25.5)         | 7 (25.9)          |        |
| Posttreatment EBV DNA            |                   |                   |                   | <0.001 |
| Undetectable                     | 124 (74.7)        | 6 (11.8)          | 2 (7.41)          |        |
| Detectable                       | 28 (16.9)         | 36 (70.6)         | 21 (77.8)         |        |
| Missing                          | 14 (8.43)         | 9 (17.6)          | 4 (14.8)          |        |
| Response of primary tumor        |                   |                   |                   | 0.077  |
| Complete response                | 27 (16.3)         | 4 (7.84)          | 2 (7.41)          |        |
| Partial response                 | 131 (78.9)        | 46 (90.2)         | 21 (77.8)         |        |
| Stable disease                   | 6 (3.61)          | 0 (0.00)          | 2 (7.41)          |        |
| Progression disease              | 2 (1.20)          | 1 (1.96)          | 2 (7.41)          |        |
| Response of metastasis           |                   |                   |                   | <0.001 |
| Complete response                | 33 (19.9)         | 3 (5.88)          | 0 (0.00)          |        |
| Partial response                 | 119 (71.7)        | 15 (29.4)         | 4 (14.8)          |        |
| Stable disease                   | 14 (8.43)         | 27 (52.9)         | 17 (63.0)         |        |
| Progression disease              | 0 (0.00)          | 6 (11.8)          | 6 (22.2)          |        |

Abbreviation: EBV DNA, Epstein–Barr virus DNA; GP, gemcitabine and platinum; FP, 5-fluorouracil and platinum; TP, taxane and platinum; TPF, taxane, platinum and 5-fluorouracil.

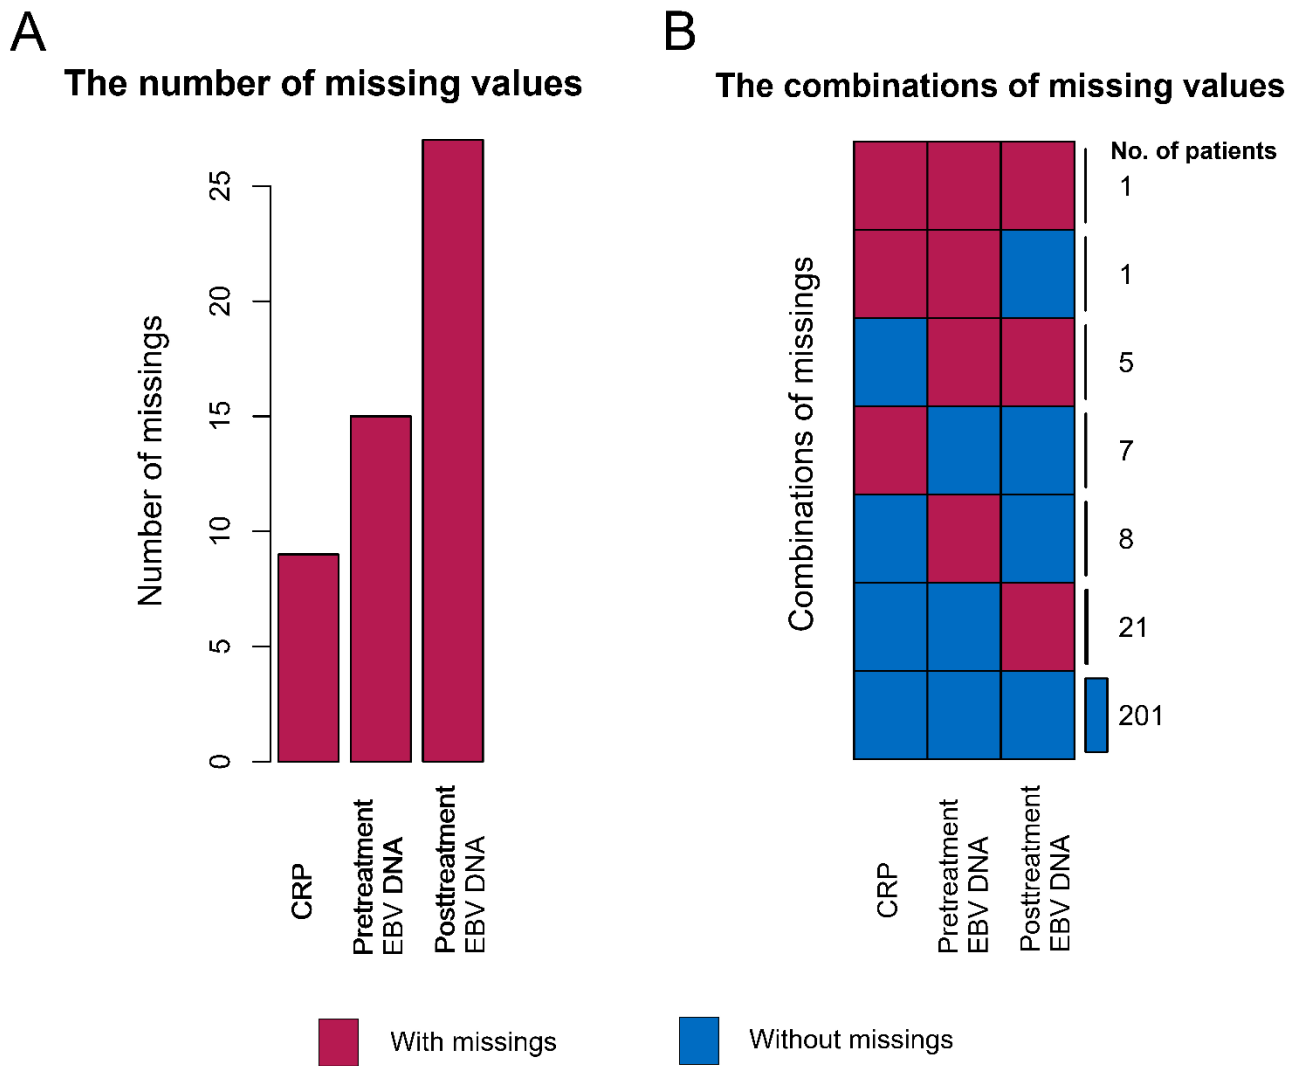

**Figure S1.** The number of missing values (A) and the combinations of missing values (B) in the dataset.

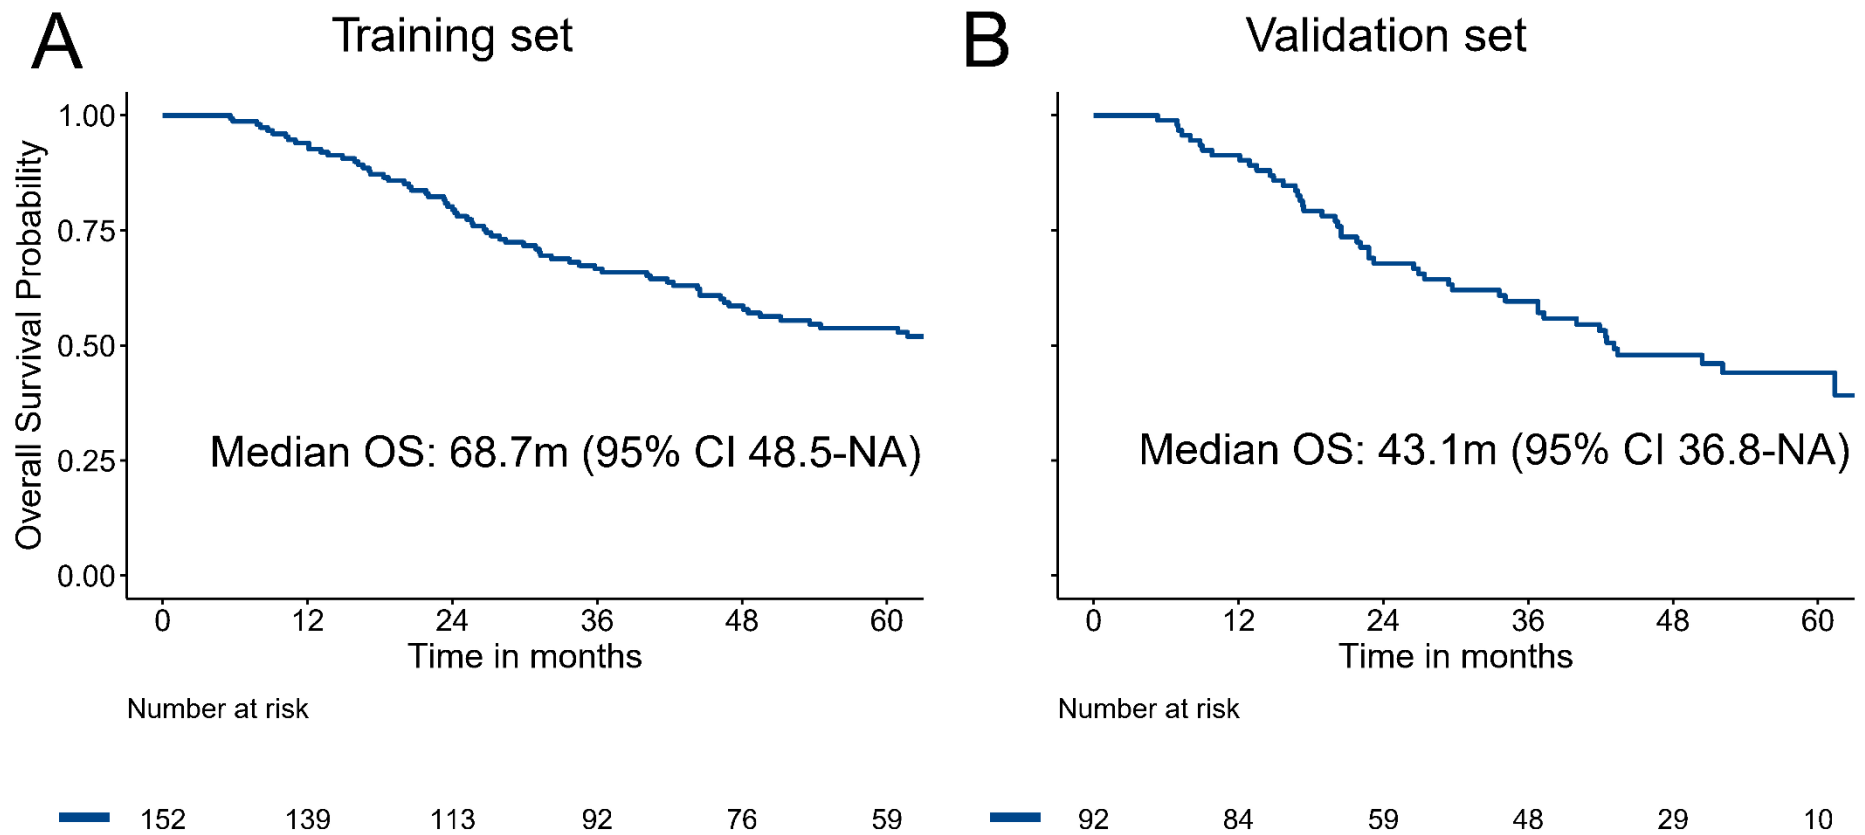

**Figure S2.** Unstratified Kaplan-Meier curve of training set (A) and validation set (B).

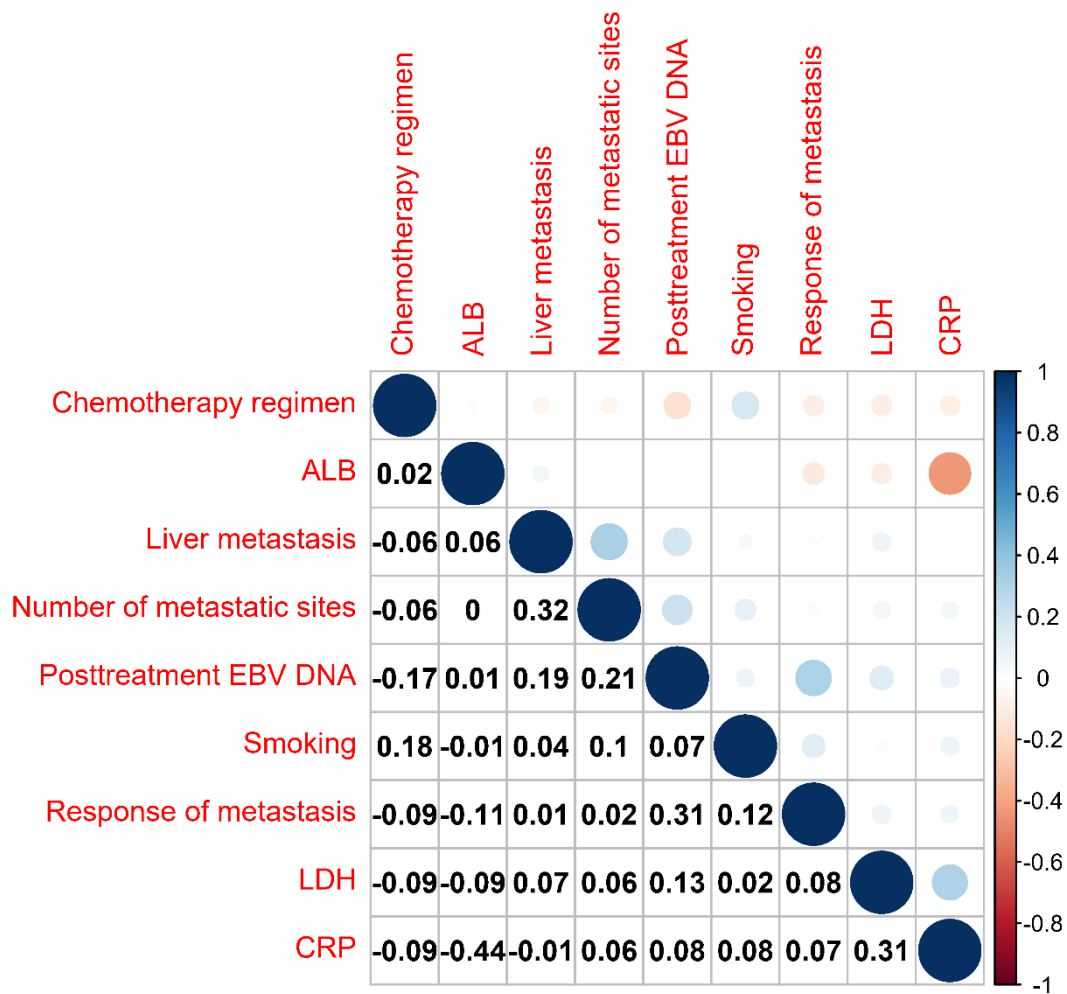

**Figure S3.** The pair-wise correlations among variables used in multivariable analysis. An absolute correlation coefficient less than 0.5 indicates weak correlation.



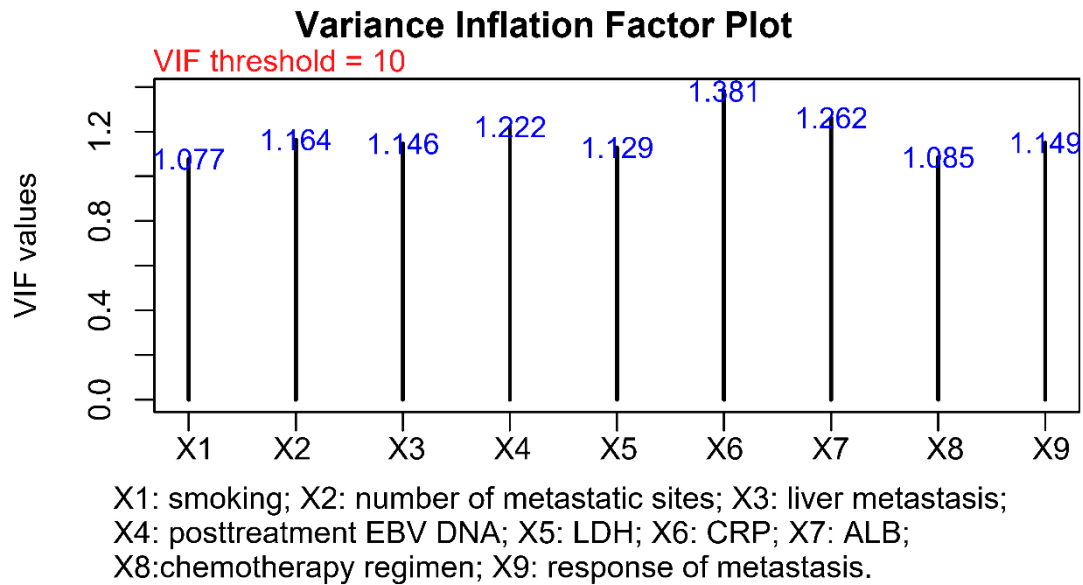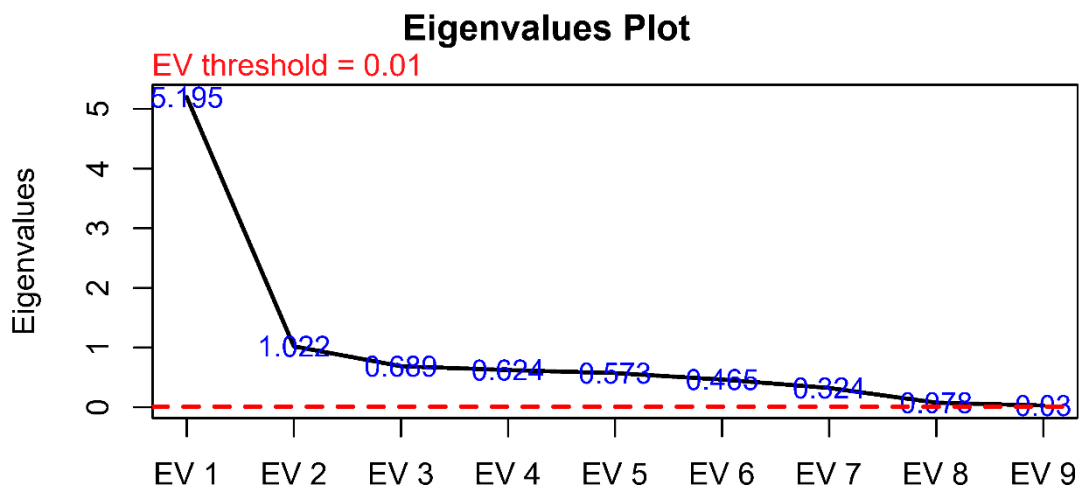

**Figure S4.** The Variance Inflation Factor (VIF) plot and Eigenvalues (EV) plot of variables used in multivariate analysis. A VIF value  $< 10$  and an EV value  $> 0.01$  indicate not severe multilinearity.

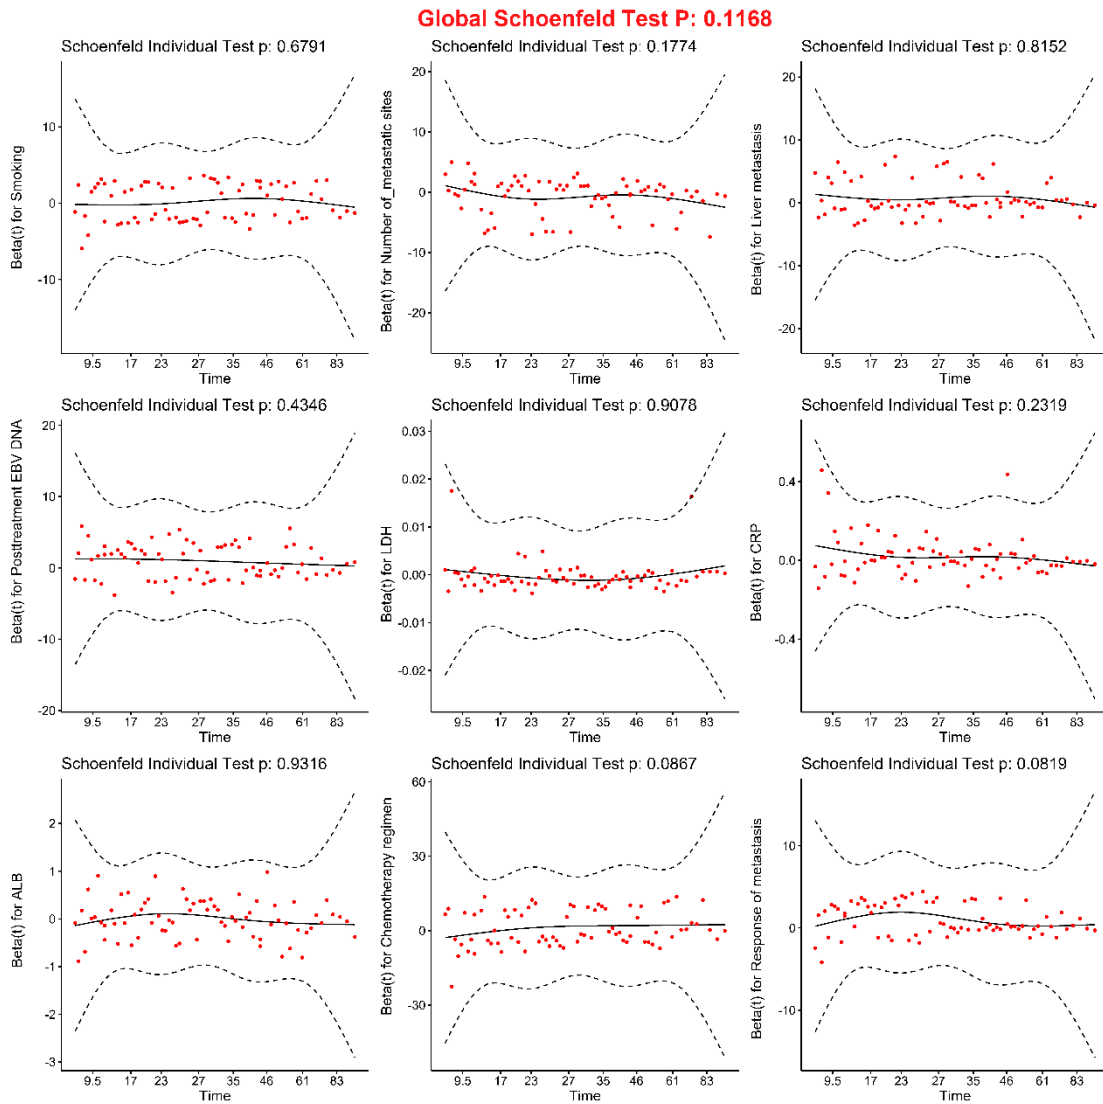

**Figure S5.** Proportional hazards diagnostics with Schoenfeld Residuals tests in the multivariate Cox regression model. A P-value  $>0.05$  meets the proportional hazards assumption.

**Tips:** To use the nomogram, draw an upward vertical line from a variable value to the “Points” bar to determine points that correspond to that variable value. Then, sum up the points from each variable value to get the prognostic score. Based on the sum, draw a downward vertical line from the “Total Points” line to calculate OS probability.

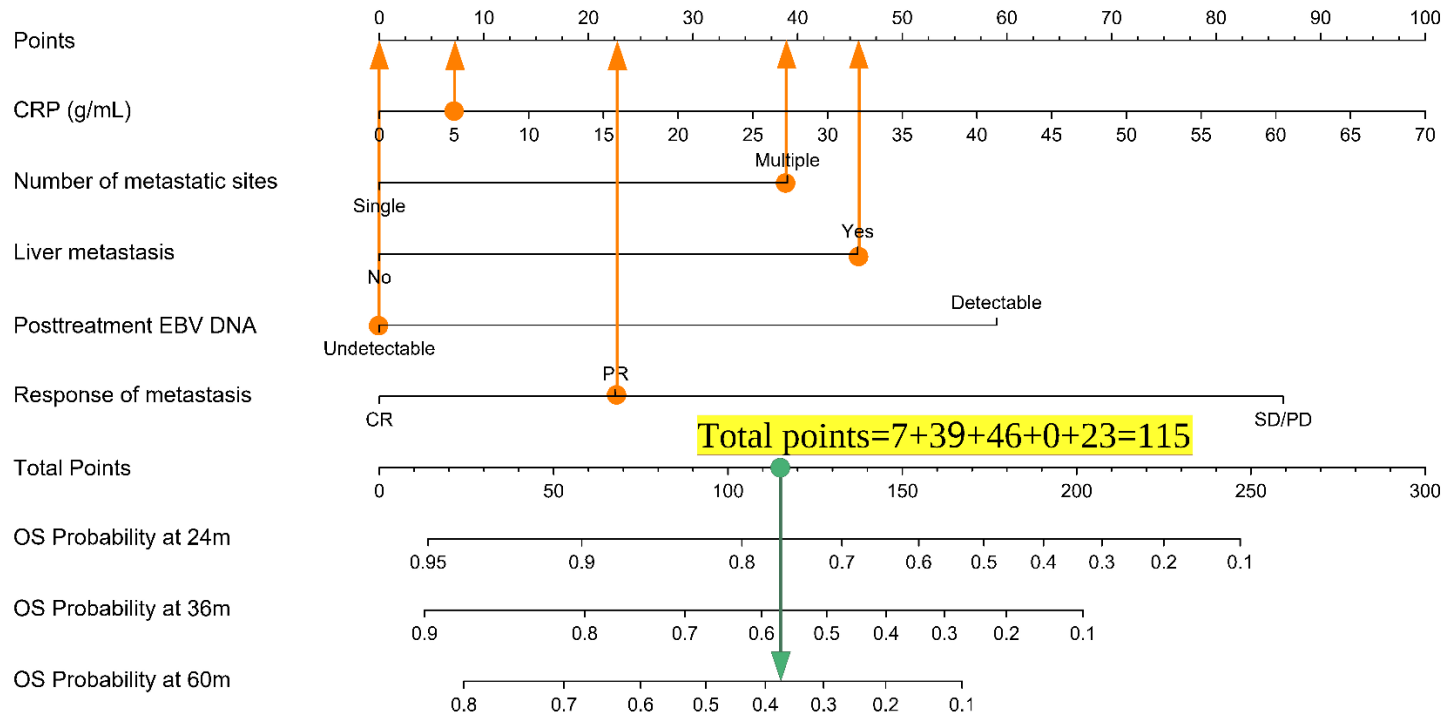

**EXAMPLE:** One patient was presented with pretreatment CRP of 5 g/mL, multiple metastatic sites, liver metastasis, undetectable posttreatment EBV DNA, and partial response to chemotherapy. The sum of points was:  $7+39+46+0+23=115$ . The corresponding OS probability at 2-, 3-, and 5-year was 76%, 57%, and 37%.

**Figure S6.** The example of how to use the nomogram.
